# Supplementary material
Source: PubMed Central journal article supplement (PMC2738991)
Supplement: NIHMS67093-supplement-legend.pdf [file NIHMS67093-supplement-legend.pdf]

**Supplementary Figure 1. Differential connectivity of rostral and caudal temporal lobe after corpus callosotomy.** Seed regions were defined (column 1) and then used to generate low frequency BOLD correlation maps both before (second column) and after (third column) corpus callosotomy. Residual interhemispheric correlations in the contralateral amygdala and anterior lateral temporal lobe are seen after callosotomy in the amygdala (row 1), anterior hippocampus (row 2) and hippocampus (row 3) correlation maps. This is consistent with known connectivity of the rostral third of the temporal lobe and amygdalae via the anterior commissure. The majority of reciprocal connections between the amygdala and hippocampus are also found in the anterior hippocampus. In contrast, there is complete loss of contralateral connectivity following callosotomy in the primary auditory cortex (row 4) and MT+ (row 5), again consistent with the known preponderance of caudal temporal lobe connectivity via the corpus callosum. Amygdala,  $z = -16.5$ ; HF = hippocampal formation,  $z = -13.5$  for both anterior HF and HF; auditory,  $z = 7.5$ ; MT+,  $z = -3.5$ .
